# Supplementary material
Source: publisher site journal article supplement (https://www.dovepress.com/article/413201)
Supplement: Supplementary file 1 [file get_supplementary_file.php]

## Supplementary File 1. Student Survey Instrument

### Block 1

Please view the IRB Resource Information Sheet prior to beginning the survey: [Click here to view Resource Information Sheet](#)

I Agree

### Default Question Block

This instrument is designed to assess your experiences in online learning. The following questions will assist us in assessing your perceptions with regard to learning in an online environment. Your responses will be held in strict confidence and your identity will not be revealed to anyone other than the researchers in the project. Please complete all pages of this questionnaire. This will take approximately 3-5 minutes.

**Please answer the following questions by marking the appropriate response.**

Compared to your current online lecture learning experiences, how would you rate your online learning experiences in today's session with the following?

Identifying key issues

Much Worse

Worse

Same

Better

Much Better

Stimulating your curiosity?

Much Worse

Worse

Same

Better

Much Better

**Identifying relevant new information?**

Much Worse      Worse      Same      Better      Much Better

**Engaging in exchange of ideas?**

Much Worse      Worse      Same      Better      Much Better

**Synthesizing ideas?**

Much Worse      Worse      Same      Better      Much Better

**Resolve problems**

Much Worse      Worse      Same      Better      Much Better

**Understand concepts**

Much Worse      Worse      Same      Better      Much Better

**Applying ideas or concepts?**

Much Worse      Worse      Same      Better      Much Better

**Expressing your emotions?**

Much Worse      Worse      Same      Better      Much Better

**Being open?**

(i.e. disclosing your personality)

Much Worse      Worse      Same      Better      Much Better

**Asking questions?**

Much Worse      Worse      Same      Better      Much Better

## Responding to others' comments?

|            |       |      |        |             |
|------------|-------|------|--------|-------------|
| Much Worse | Worse | Same | Better | Much Better |
|------------|-------|------|--------|-------------|

## Sustaining discussion?

|            |       |      |        |             |
|------------|-------|------|--------|-------------|
| Much Worse | Worse | Same | Better | Much Better |
|------------|-------|------|--------|-------------|

## Feeling part of the class community?

|            |       |      |        |             |
|------------|-------|------|--------|-------------|
| Much Worse | Worse | Same | Better | Much Better |
|------------|-------|------|--------|-------------|

## Referring to others by name?

|            |       |      |        |             |
|------------|-------|------|--------|-------------|
| Much Worse | Worse | Same | Better | Much Better |
|------------|-------|------|--------|-------------|

## Expectations are communicated clearly

|            |       |      |        |             |
|------------|-------|------|--------|-------------|
| Much Worse | Worse | Same | Better | Much Better |
|------------|-------|------|--------|-------------|

## Activities are well designed

|            |       |      |        |             |
|------------|-------|------|--------|-------------|
| Much Worse | Worse | Same | Better | Much Better |
|------------|-------|------|--------|-------------|

## Taking responsibility?

|            |       |      |        |             |
|------------|-------|------|--------|-------------|
| Much Worse | Worse | Same | Better | Much Better |
|------------|-------|------|--------|-------------|

## Set climate for learning

|            |       |      |        |             |
|------------|-------|------|--------|-------------|
| Much Worse | Worse | Same | Better | Much Better |
|------------|-------|------|--------|-------------|

## Summarize discussion

|            |       |      |        |             |
|------------|-------|------|--------|-------------|
| Much Worse | Worse | Same | Better | Much Better |
|------------|-------|------|--------|-------------|

Feeling comfortable engaging in discussion?

Much Worse      Worse      Same      Better      Much Better

Feeling comfortable with teaching methods?

Much Worse      Worse      Same      Better      Much Better

Understanding organization of the class?

Much Worse      Worse      Same      Better      Much Better

Feeling satisfied with teacher interaction  
(questions, comments, facilitation)?

Much Worse      Worse      Same      Better      Much Better

Receiving teacher assistance in reaching  
consensus?

Much Worse      Worse      Same      Better      Much Better

Receiving teaching intervention?

Much Worse      Worse      Same      Better      Much Better

Assess learning outcomes

Much Worse      Worse      Same      Better      Much Better

Accepting teacher feedback?

Much Worse      Worse      Same      Better      Much Better

Copyright © 2021 Stanford Medicine.

Powered by Qualtrics

## Supplementary File 2. Facilitator Survey Instrument

### Default Question Block

I feel that overall the thyroid small group tutorial was effective in the online format.

Strongly disagree   Somewhat disagree   Neither agree nor disagree   Somewhat agree   Strongly agree

I feel the small group tutorial was more effective online than in-person.

Strongly disagree   Somewhat disagree   Neither agree nor disagree   Somewhat agree   Strongly agree

I feel tutorials should be delivered in an online format more.

Strongly disagree   Somewhat disagree   Neither agree nor disagree   Somewhat agree   Strongly agree

I feel the online small group tutorial format was more effective than an online traditional large group lecture format.

Strongly disagree   Somewhat disagree   Neither agree nor disagree   Somewhat agree   Strongly agree

I enjoyed teaching in this online small group tutorial format more than I have in online traditional lecture formats.

Strongly disagree   Somewhat disagree   Neither agree nor disagree   Somewhat agree   Strongly agree

I feel the students were prepared for the tutorial session (i.e. watched the pre-tutorial lecture videos).

Strongly disagree   Somewhat disagree   Neither agree nor disagree   Somewhat agree   Strongly agree

I feel the students were engaged during the tutorial session.

Strongly disagree   Somewhat disagree   Neither agree nor disagree   Somewhat agree   Strongly agree

I feel the students understood each case material by the end of its tutorial.

Strongly disagree   Somewhat disagree   Neither agree nor disagree   Somewhat agree   Strongly agree

I feel the students learned the basics of thyroid clinical principles by the end of the tutorial.

Strongly disagree   Somewhat disagree   Neither agree nor disagree   Somewhat agree   Strongly agree

How many cases were you able to go through with the students?

1

2

3

4

Copyright © 2021 Stanford Medicine.

Powered by Qualtrics

## Supplementary File 3. IRB Research Information Sheet

|                                                                                          |                                                                        |
|------------------------------------------------------------------------------------------|------------------------------------------------------------------------|
| <b>STANFORD UNIVERSITY Research Information Sheet</b>                                    | <i>IRB Use Only</i>                                                    |
| Protocol Director: Neil Gesundheit, MD, MPH                                              | Approval Date: September 3, 2020<br>Expiration Date: (Does Not Expire) |
| Protocol Title: Comparing Small Group and Lecture Modalities in Teaching Thyroid Online. |                                                                        |

**DESCRIPTION:** You are invited to participate in a research study on interactive online small group learning experiences. The purpose of this study is to assess the student perceptions of small group teaching modalities in online settings. We hope to gain insight as to the most effective and best received modality to inform future instruction on this topic. After the experiencing regularly scheduled course session and content, you will be invited to complete a short survey of your perceptions.

**TIME INVOLVEMENT:** Your participation will take approximately 10 minutes.

**RISKS AND BENEFITS:** The risk associated with this study is a minor increase in survey fatigue. The benefits which may reasonably be expected to result from this study are an increase in the generalizable knowledge of interactive online modalities. We cannot and do not guarantee or promise that you will receive any benefits from this study. Your decision whether or not to participate in this study will not affect your grade in the course.

**PAYMENTS:** You will not receive payment for your participation.

**PARTICIPANT'S RIGHTS:** If you have read this form and have decided to participate in this project, please understand your participation is voluntary and you have the right to withdraw your consent or discontinue participation at any time without penalty or loss of benefits to which you are otherwise entitled. The alternative is not to participate. You have the right to refuse to answer particular questions. The results of this research study may be presented at scientific or professional meetings or published in scientific journals. Your individual privacy will be maintained in all published and written data resulting from the study. Your identities will not be recorded and cannot be disclosed for that reason.

**CONTACT INFORMATION:**

*Questions:* If you have any questions, concerns or complaints about this research, its procedures, risks and benefits, contact the Protocol Director, Adam Hain at (650) 736-7227 or at [adamhain@stanford.edu](mailto:adamhain@stanford.edu).

*Independent Contact:* If you are not satisfied with how this study is being conducted, or if you have any concerns, complaints, or general questions about the research or your rights as a participant, please contact the Stanford Institutional Review Board (IRB) to speak to someone independent of the research team at (650) 723-5244 or toll free at 1-866-680-2906. You can also write to the Stanford IRB, Stanford University, 1705 El Camino Real, Palo Alto, CA 94306.

**Please print a copy of this page for your records.**

**If you agree to participate in this research, please check the box that indicates “I agree” below. Then complete the short survey that follows.**
